# Supplementary material
Source: PubMed Central journal article supplement (PMC3781591)
Supplement: NIHMS512351-supplement-supplement_1.pdf [file NIHMS512351-supplement-supplement_1.pdf]

Supplemental Table 1. Fold mRNA expression of NRs and their selected coregulators during differentiation of NSCs upon FGF2 withdrawal.

| Subfamilies and Group       | Genes | Receptor Name                           | Receptor Symbol                                  | Before FGF2 withdrawal           |             | 1 day after FGF2 withdrawal |            | 2 day after FGF2 withdrawal |            | 3 day after FGF2 withdrawal |            | 4 day after FGF2 withdrawal |            | 5 day after FGF2 withdrawal |            |            |            |            |            |             |            |            |
|-----------------------------|-------|-----------------------------------------|--------------------------------------------------|----------------------------------|-------------|-----------------------------|------------|-----------------------------|------------|-----------------------------|------------|-----------------------------|------------|-----------------------------|------------|------------|------------|------------|------------|-------------|------------|------------|
|                             |       |                                         |                                                  | Mean                             | SE          | Mean                        | SE         | Mean                        | SE         | Mean                        | SE         | Mean                        | SE         | Mean                        | SE         |            |            |            |            |             |            |            |
| 1 Classic Nuclear Receptors | IA    | NR1A1                                   | Thyroid Hormone Receptor alpha                   | THRalpha                         | 1.0491177   | 0.2591973                   | 1.0633659  | 0.7305151                   | 0.4232390  | 3.6113444                   | 1.2651702  | 0.7225454                   | 2.5289055  | 3.2886874                   | 1.8987648  | 1.5964932  | 0.7331007  | 1.8406205  | 5.3499438  | 0.80715     |            |            |
|                             |       | NR1A2                                   | Thyroid Hormone Receptor beta                    | THRbeta                          | 1.055782067 | 0.3220676                   | 0.6225952  | 0.17597862                  | 0.10160429 | 10.202329                   | 15.1976236 | 8.7746095                   | 0.6549251  | 0.2540196                   | 0.14488335 | 1.1713101  | 0.4060946  | 0.2321871  | 1.5172562  | 0.4671604   | 0.2821769  |            |
|                             |       | NR1B1                                   | Retinoic Acid Receptor alpha                     | RARalpha                         | 1.0262975   | 0.7064094                   | 3.937648   | 1.1456185                   | 0.1564649  | 32.991577                   | 53.150464  | 3.6744396                   | 1.0541975  | 14.299259                   | 0.6993022  | 0.8259119  | 1.911329   | 6.0313511  | 1.0616139  | 12.220432   | 0.7614055  |            |
|                             |       | NR1B2                                   | Retinoic Acid Receptor beta                      | RARbeta                          | 1.053655327 | 0.30978826                  | 0.3141656  | 0.4151611                   | 0.23970041 | 1.0179796                   | 0.4969971  | 0.2873135                   | 0.8144827  | 0.30241108                  | 0.17460224 | 0.6764539  | 0.58017072 | 0.3347155  | 0.4729116  | 0.4731417   | 0.2321763  |            |
|                             |       | NR1B3                                   | Retinoic Acid Receptor gamma                     | RARGamma                         | 1.02789352  | 0.1609623                   | 0.6409487  | 0.3028671                   | 0.17486244 | 2.9097406                   | 1.1037098  | 0.4099325                   | 0.23610421 | 1.3197989                   | 0.4099325  | 0.23610421 | 1.3197989  | 0.4099325  | 0.23610421 | 1.3197989   | 0.4099325  | 0.23610421 |
|                             |       | NR1C1                                   | Peroxisome Proliferator-activated Receptor alpha | PPARalpha                        | 1.019715039 | 0.11382817                  | 0.9608653  | 0.34671475                  | 0.20018173 | 1.1488135                   | 1.5488262  | 0.8942164                   | 1.348556   | 0.2795602                   | 0.61129101 | 1.3077596  | 0.19137516 | 1.1049374  | 1.477359   | 0.9794031   | 0.5647525  |            |
|                             |       | NR1C2                                   | Peroxisome Proliferator-activated Receptor gamma | PPARGamma                        | 1.044537427 | 0.2578376                   | 1.3443136  | 1.56993929                  | 0.9051104  | 1.5433589                   | 1.2991329  | 0.7209328                   | 1.1998836  | 0.31237964                  | 0.8713195  | 4.4316439  | 2.6976386  | 1.30611506 | 4.9935269  | 3.5504261   | 2.04101825 |            |
|                             |       | NR1D1                                   | RAR-related Orphan Receptor alpha                | RORalpha                         | 1.06864077  | 0.0394248                   | 2.4598172  | 1.22453824                  | 0.7070022  | 5.0793488                   | 2.9047167  | 1.709263                    | 1.4947975  | 0.49081301                  | 0.2833795  | 3.7896887  | 1.6681538  | 1.2647074  | 2.783055   | 1.5517695   | 0.87078915 |            |
|                             |       | NR1D2                                   | RAR-related Orphan Receptor beta                 | RORbeta                          | 1.143165015 | 0.8268785                   | 0.517013   | 0.38000157                  | 0.17783    | 2.6154103                   | 0.8759172  | 0.5057489                   | 0.6560207  | 0.32690524                  | 0.18874437 | 0.7386233  | 0.15287537 | 0.0882623  | 0.40813807 | 0.2356455   |            |            |
|                             |       | NR1D3                                   | RAR-related Orphan Receptor gamma                | RORGamma                         | 1.04084208  | 0.23584416                  | 7.5457391  | 1.77822658                  | 0.2666825  | 19.284142                   | 13.624682  | 7.867442                    | 10.243269  | 2.7504924                   | 1.5800408  | 40.675312  | 14.335267  | 8.27671905 | 3.3746336  | 0.65720938  | 0.1354114  |            |
|                             |       | NR1H2                                   | Liver X Receptor beta                            | LXRbeta                          | 1.02464809  | 0.14229014                  | 2.5647325  | 3.10747952                  | 1.79415469 | 3.408647                    | 2.5497491  | 1.4751712                   | 1.2119767  | 0.8504717                   | 0.20741753 | 1.827054   | 0.6494956  | 0.3865641  | 1.5894547  | 0.3711927   | 0.2148842  |            |
|                             |       | NR1H3                                   | Liver X Receptor alpha                           | LXRalpha                         | 1.029924257 | 0.1208098                   | 1.2024194  | 1.9816787                   | 0.11441563 | 4.6502748                   | 3.0756043  | 1.7650439                   | 1.2267757  | 0.3707932                   | 0.21408383 | 1.9617459  | 0.03614378 | 0.0208034  | 2.2322373  | 0.4089872   | 0.23611935 |            |
|                             |       | NR1H4                                   | Farnesoid X Receptor alpha                       | FXRalpha                         | 1.01494519  | 0.43273204                  | 1.2916734  | 1.84026205                  | 1.0625959  | 5.815343                    | 4.8916751  | 2.8220989                   | 1.0447102  | 0.409492                    | 0.2526258  | 5.6849078  | 1.7585789  | 4.131258   | 0.4609173  | 0.2867766   | 0.1988239  |            |
|                             |       | NR1H5                                   | Farnesoid X Receptor beta                        | FXRbeta                          | 1.01132104  | 0.4683016                   | 1.5331493  | 1.9437328                   | 1.1222448  | 4.8629972                   | 3.9547915  | 2.6423269                   | 1.3665401  | 0.4089942                   | 0.2499942  | 4.4713847  | 2.881619   | 3.275891   | 2.1164896  | 0.2228107   |            |            |
|                             |       | NR1I1                                   | Vitamin D Receptor                               | VDR                              | 1.05186565  | 0.3070818                   | 1.3751348  | 1.1109639                   | 0.4414471  | 6.0636745                   | 1.7403387  | 1.0048143                   | 0.8391744  | 0.5999109                   | 0.3441518  | 0.7777885  | 0.22499388 | 0.1290409  | 0.9349042  | 1.2781376   | 0.7380835  |            |
|                             |       | NR1I2                                   | Vitamin D Receptor                               | VDR                              | 1.01759164  | 0.4007607                   | 1.6423114  | 1.2740553                   | 0.5529251  | 3.6445599                   | 1.6553476  | 0.9449316                   | 1.4942921  | 0.2645667                   | 0.1171663  | 0.2899467  | 0.21381172 | 0.1221159  | 1.4875426  | 0.1028043   | 0.0858917  |            |
|                             |       | NR1I3                                   | Constitutive Androstane Receptor                 | CAR                              | 1.023195212 | 0.1392915                   | 0.9604971  | 0.0326159                   | 0.01883437 | 1.775555                    | 1.0495697  | 1.0179738                   | 1.0410862  | 0.0814585                   | 1.0878909  | 0.05709616 | 0.0326645  | 1.5864645  | 0.4704548  | 0.04699714  |            |            |
|                             |       | NR2A                                    | NR2A1                                            | Hepatic Nuclear Receptor 4 gamma | HNF4alpha   | 1.05188361                  | 0.2995593  | 1.022574                    | 0.75991123 | 0.4387482                   | 5.4054569  | 4.9531329                   | 2.8976518  | 3.8291812                   | 1.1015225  | 0.63598297 | 3.1576078  | 0.69384342 | 0.40060244 | 0.7110228   | 0.48043817 | 0.27738921 |
|                             |       | NR2A2                                   | NR2A2                                            | Hepatic Nuclear Receptor 4 gamma | HNF4gamma   | 1.0599325                   | 0.25192    | 0.829278                    | 1.1903255  | 0.687318                    | 48.2473509 | 110.33896                   | 63.589434  | 0.4281778                   | 0.2817935  | 0.1688946  | 1.8909434  | 1.4201007  | 0.2817935  | 0.0873499   | 0.12957315 | 0.07181071 |
|                             |       | NR2B                                    | NR2B1                                            | Retinoid X Receptor alpha        | RXRalpha    | 1.18063264                  | 0.6815857  | 0.2270676                   | 1.0127835  | 0.7031394                   | 1.0515938  | 0.7103182                   | 0.2338153  | 0.06699086                  | 0.03867833 | 0.5024036  | 1.0449347  | 0.0831944  | 0.689961   | 0.2103669   | 0.4710360  |            |
| NR2B                        | NR2B2 | Retinoid X Receptor beta                | RXRbeta                                          | 1.033003399                      | 0.1905508   | 1.697781                    | 0.5751381  | 0.3206364                   | 4.1411181  | 3.11192641                  | 1.7967245  | 1.2792425                   | 0.13145973 | 0.07590054                  | 2.2699806  | 0.38419805 | 0.2218325  | 1.9958514  | 0.54170103 | 0.13276041  |            |            |
| NR2B                        | NR2B3 | Retinoid X Receptor gamma               | RXRGamma                                         | 1.046277628                      | 0.5558755   | 2.1207364                   | 14.271951  | 8.2401548                   | 5.9219271  | 29.048584                   | 16.7718557 | 3.9571414                   | 1.26627001 | 0.73110798                  | 3.8685996  | 0.73221457 | 0.4233405  | 5.9115384  | 2.0129275  | 1.6219833   |            |            |
| NR2C                        | NR2C1 | Testicular Receptor 2                   | TR2                                              | 1.04752646                       | 0.2750285   | 0.5268039                   | 0.20939474 | 0.12089765                  | 1.7692091  | 1.2205486                   | 0.70470477 | 0.3616072                   | 0.23221959 | 0.13407558                  | 0.7082927  | 0.1271192  | 0.0734018  | 0.8889913  | 0.2924652  | 0.1381309   |            |            |
| NR2C2                       | NR2C2 | Testicular Receptor 4                   | TR4                                              | 1.01707075                       | 0.11378219  | 1.3780587                   | 0.0874819  | 0.05488972                  | 2.5452701  | 1.51635212                  | 0.8754998  | 1.0664439                   | 0.13491842 | 0.07789747                  | 1.4270313  | 0.1224272  | 0.0706327  | 1.55423    | 0.0569944  | 0.0329665   |            |            |
| NR2E                        | NR2E2 | Talless                                 | TLL                                              | 1.04075162                       | 0.2353043   | 0.8646456                   | 0.28205355 | 0.16288487                  | 6.7054828  | 2.9513082                   | 1.3828699  | 1.6933291                   | 0.6837882  | 0.39467553                  | 2.263522   | 1.9025802  | 1.094891   | 4.756442   | 1.9222387  | 1.1386948   |            |            |
| NR2E                        | NR2E3 | Photospic Nuclear Receptor              | PNR                                              | 1.05503458                       | 0.3177155   | 1.8674849                   | 1.14966402 | 0.6377783                   | 1.5382926  | 0.7165117                   | 0.41369036 | 2.2888429                   | 0.24205176 | 1.31975275                  | 2.1984073  | 0.14311834 | 1.2634374  | 0.5621424  | 0.23264259 |             |            |            |
| NR2F                        | NR2F1 | Chicken Ovalbumin Upstream Promoter-TF1 | COUP-TF1                                         | 1.13781401                       | 0.7959235   | 0.404242                    | 0.31979152 | 0.18463713                  | 2.6471164  | 1.94131058                  | 1.1208497  | 0.2719087                   | 1.4258347  | 0.08247891                  | 0.3392404  | 0.20661401 | 0.11292925 | 1.1040611  | 0.0661882  | 0.03857899  |            |            |
| NR2F                        | NR2F2 | Chicken Ovalbumin Upstream Promoter-TF1 | COUP-TF1                                         | 1.0349932                        | 0.14145637  | 1.4718919                   | 0.2883358  | 0.1644597                   | 1.9827307  | 1.312326                    | 0.7133665  | 1.4571829                   | 0.1821809  | 0.1484886                   | 0.2301959  | 0.4402891  | 0.7674929  | 1.7297189  | 0.1674929  | 0.0449181   |            |            |
| NR2F6                       | NR2F6 | ER-Related 2                            | EAR2                                             | 1.017874058                      | 0.1031985   | 0.5885807                   | 0.09013262 | 0.05203269                  | 2.1991131  | 1.52317161                  | 0.8794294  | 0.8224136                   | 1.2405348  | 0.1414884                   | 0.8275548  | 0.07795195 | 0.04066533 | 1.1046018  | 0.0568182  | 0.0308799   |            |            |
| NR3A                        | NR3A1 | Estrogen Receptor alpha                 | ERalpha                                          | 1.08271449                       | 0.4761651   | 3.9126085                   | 0.7032228  | 0.71548651                  | 11.787599  | 13.4531009                  | 7.8897956  | 2.377425                    | 2.339109   | 0.7119436                   | 3.2852683  | 1.3852993  | 0.7225277  | 4.6974245  | 0.7126264  | 0.41351364  |            |            |
|                             | NR3A2 | Estrogen Receptor beta                  | ERbeta                                           | 1.020264876                      | 0.15106489  | 1.4961496                   | 0.6087475  | 0.3668044                   | 2.8484966  | 1.9218871                   | 1.2510851  | 2.604358                    | 0.2718205  | 0.1741825                   | 3.222919   | 0.2502861  | 0.1521091  | 1.8216811  | 0.0456783  | 0.041262072 |            |            |
| NR3B                        | NR3B1 | Estrogen-related Receptor alpha         | ERRalpha                                         | 1.143200628                      | 0.8267938   | 0.416713                    | 0.63530564 | 0.3686844                   | 2.8484966  | 1.9218871                   | 1.2510851  | 2.604358                    | 0.2718205  | 0.1741825                   | 3.222919   | 0.2502861  | 0.1521091  | 1.8216811  | 0.0456783  | 0.041262072 |            |            |
| NR3B2                       | NR3B2 | Estrogen-related Receptor beta          | ERRbeta                                          | 1.0534856                        | 0.3808804   | 0.3179274                   | 1.4250455  | 0.8022745                   | 0.8359294  | 0.5366639                   | 3.0679488  | 0.6041136                   | 0.1733247  | 0.07492126                  | 0.2279753  | 0.0834778  | 0.0481974  | 0.1998308  | 0.1173195  | 0.0665782   |            |            |
| NR3B3                       | NR3B3 | Estrogen-related Receptor gamma         | ERRgamma                                         | 1.031891374                      | 0.48314669  | 0.5491141                   | 0.1748055  | 0.0922764                   | 3.801414   | 1.9246647                   | 0.9204624  | 1.3026167                   | 0.3402654  | 0.1760261                   | 0.7600251  | 0.1902005  | 0.711102   | 0.4542801  | 0.2429223  |             |            |            |
| NR3C                        | NR3C1 | Glucocorticoid Receptor                 | GR                                               | 1.01712837                       | 0.0765564   | 0.797574                    | 1.1174805  | 0.67551166                  | 2.3801442  | 0.7566123                   | 0.43684306 | 2.7431703                   | 1.8384988  | 1.06148867                  | 2.1147772  | 0.38620056 | 0.22279954 | 2.5513606  | 0.4959803  | 0.28636295  |            |            |
| NR3C2                       | NR3C2 | Mincratocolin Receptor                  | MR                                               | 1.03846069                       | 0.2172006   | 3.425308                    | 1.3655962  | 0.7884738                   | 7.2476025  | 5.14404304                  | 2.9731038  | 20.277785                   | 1.5665454  | 0.9447194                   | 31.231827  | 27.362147  | 15.7988021 | 18.119595  | 2.8397925  | 1.5422744   |            |            |
| NR3C3                       | NR3C3 | Progesterone Receptor                   | PR                                               | 1.02345596                       | 0.13974759  | 0.6479192                   | 0.08524477 | 0.0502189                   | 1.8452494  | 1.0852494                   | 0.8452494  | 1.0852494                   | 0.8452494  | 1.0852494                   | 0.8452494  | 1.0852494  | 0.8452494  | 1.0852494  | 0.8452494  | 1.0852494   |            |            |
| NR3C4                       | NR3C4 | Androgen Receptor                       | AR                                               | 1.01721894                       | 0.0743513   | 1.1527484                   | 1.1778189  | 0.85828787                  | 1.903892   | 1.6026238                   | 0.9674433  | 1.1162519                   | 0.6709884  | 0.0687807                   | 1.1789534  | 0.1033212  | 0.0672882  | 1.2639285  | 0.1528386  |             |            |            |
| NR4A                        | NR4A1 | NUR1                                    | NUR1                                             | 1.00972774                       | 0.55612708  | 0.915971                    | 0.55612708 | 0.3261003                   | 4.070565   | 0.1886992                   | 0.1088263  | 0.0733881                   | 0.0682298  | 0.0682298                   | 0.0682298  | 0.0682298  | 0.0682298  | 0.0682298  | 0.0682298  | 0.0682298   |            |            |
|                             | NR4A2 | NUR2                                    | NUR2                                             | 1.01932871                       | 0.1150318   | 0.858125                    | 0.0458082  | 0.01992429                  | 2.487575   | 1.7464378                   | 1.0785964  | 0.05690024                  | 0.03728897 | 0.2454997                   | 0.0900024  | 0.0384648  | 0.1435137  | 0.1283717  | 0.05884    |             |            |            |
| NR4A3                       | NR4A3 | NOR1                                    | NOR1                                             | 1.17119796                       | 0.9997885   | 0.2742287                   | 0.4        |                             |            |                             |            |                             |            |                             |            |            |            |            |            |             |            |            |
